# Supplementary material for: Effects of the age of raised beds on the physicochemical characteristics of fruit orchard soil in the Vietnamese Mekong Delta
Source: PeerJ. 2023 Sep 29;11:e16178. doi: 10.7717/peerj.16178 (PMC10544351; doi:10.7717/peerj.16178)
Supplement: Supplemental Information 1 [file peerj-11-16178-s001.xlsx]

## Sheet: Soil chemical data
									meq/100g					g/cm3
	Age of raised beds	Depth	Replication	pH (1:2.5)	AP (mg kg-1)	EC (mS/cm)	Nts (%)	SOM (%)	Na	K	Ca	Mg	CEC	BD	Soil porosity (%)
	Old (42 years old)	0-20	1	4.25	11.5	0.27	0.12	2.02	0.22	0.22	5.25	6.35	16.2	1.3	50.9434
			2	4.31	10.6	0.29	0.1	1.95	0.18	0.31	5.49	6.16	15.9	1.24	53.2075
			3	4.36	10.5	0.29	0.09	1.89	0.18	0.27	5.68	6.15	17.3	1.14	56.9811
			4	4.45	8.9	0.3	0.09	2.05	0.21	0.28	5.55	6.75	16.4	1.22	53.9623
		20-40	1	4.21	15.1	0.3	0.09	2.15	0.24	0.36	5.75	6.56	16.2	1.17	55.8491
			2	4.3	14.2	0.29	0.11	2.2	0.27	0.37	5.68	6.33	15.8	1.25	52.8302
			3	4.22	13.5	0.31	0.08	2.01	0.19	0.4	5.99	6.83	17	1.19	55.0943
			4	4.36	15	0.3	0.09	2.08	0.26	0.31	5.88	6.4	16.6	1.16	56.2264
		40-60	1	4.83	18.5	0.35	0.12	2.19	0.3	0.28	6.15	6.11	17.2	1.09	58.8679
			2	4.86	19.7	0.36	0.08	2.29	0.28	0.26	6.26	6.39	17	1.11	58.1132
			3	4.79	20.1	0.34	0.09	2.36	0.31	0.35	6.08	7.32	17.3	1.06	60
			4	4.88	19.4	0.36	0.1	2.15	0.33	0.41	6.22	7.16	17.6	1.03	61.1321
		60-80	1	5.12	22.2	0.35	0.08	2.1	0.36	0.36	6.32	6.87	16.2	1.08	59.2453
			2	4.83	19.6	0.32	0.11	2.36	0.29	0.25	6.45	6.65	17.5	1.04	60.7547
			3	4.79	20.2	0.38	0.13	2.42	0.31	0.48	6.18	6.69	17.4	0.98	63.0189
			4	4.89	19.9	0.35	0.09	2.18	0.35	0.35	6.39	7.01	16.5	1.13	57.3585
		80-100	1	5.18	22.5	0.39	0.11	2.32	0.28	0.47	6.4	6.19	15.9	0.99	62.6415
			2	5.13	22.3	0.38	0.08	2.25	0.37	0.36	6.38	6.36	17.6	1.04	60.7547
			3	4.78	19.5	0.36	0.09	2.18	0.31	0.31	6.37	6.88	16.9	1.01	61.8868
			4	4.89	19.9	0.36	0.12	2.59	0.27	0.33	6.25	7.06	17.2	1.02	61.5094
	Young (10 years old)	0-20	1	5.21	15.2	0.25	0.12	2.45	0.25	0.3	6	7.45	17.9	1.05	60.3774
			2	5.28	15.6	0.25	0.1	2.35	0.35	0.2	6.21	7.31	18.2	1.15	56.6038
			3	5.42	17.2	0.3	0.09	2.51	0.33	0.36	6.08	7	18.5	1.03	61.1321
			4	5.18	14	0.3	0.11	2.71	0.29	0.25	6.11	7.96	18.7	1.08	59.2453
		20-40	1	5.27	17.8	0.31	0.1	2.19	0.31	0.29	6.26	7.37	18.3	1.13	57.3585
			2	5.41	18.8	0.31	0.08	2.42	0.37	0.38	6.04	7.69	18.1	1.05	60.3774
			3	5.29	20.5	0.29	0.11	2.55	0.34	0.34	6.3	6.87	19.3	1.05	60.3774
			4	5.18	16.2	0.29	0.13	2.61	0.28	0.31	6.07	6.93	18.9	0.99	62.6415
		40-60	1	5.62	22.2	0.35	0.07	2.32	0.39	0.5	6.2	7.09	16.8	1.13	57.3585
			2	5.6	20.5	0.32	0.08	2.45	0.33	0.31	6.15	6.36	18.2	1.11	58.1132
			3	5.23	19.9	0.32	0.13	2.1	0.25	0.35	6.35	6.96	19.1	1.03	61.1321
			4	5.39	20.1	0.35	0.05	2.3	0.34	0.37	6.31	6.69	18.5	1.05	60.3774
		60-80	1	5.64	22.3	0.34	0.09	2.22	0.36	0.31	6.28	6.56	19.3	0.99	62.6415
			2	5.39	19.8	0.32	0.12	2.36	0.38	0.42	6.31	6.92	18.4	1.11	58.1132
			3	5.61	20.5	0.33	0.1	2.41	0.27	0.4	6.28	6.09	17.2	1.05	60.3774
			4	5.67	21.2	0.41	0.07	2.35	0.38	0.31	6.46	6.58	18.7	0.99	62.6415
		80-100	1	5.51	20.5	0.32	0.09	2.38	0.25	0.35	6.29	6.71	18.7	1.14	56.9811
			2	5.61	21.8	0.35	0.11	2.15	0.42	0.33	6.36	6.36	18.4	1.16	56.2264
			3	5.65	22.2	0.33	0.08	2.25	0.36	0.4	6.26	6.18	19.2	0.97	63.3962
			4	5.49	21	0.36	0.12	2.31	0.29	0.37	6.25	6.46	17.9	1.03	61.1321

## Sheet: Soil texture
			Depth	Replication	Sand	Silt	Clay	Sand	Silt	Clay
					%			%
					Young raised bed			Old raised bed
			0-20	1	1.036	49.6	49.364	0.82	49.5	49.68
				2	0.873	48.8	50.327	0.918	48.5	50.582
				3	0.88	50.2	48.92	0.93	50.5	48.57
				4	0.83	48.2	50.97	0.919	49.7	49.381
			20-40	1	1.06	49.8	49.14	1.375	48.9	49.725
				2	1.019	50.5	48.481	1.07	49.2	49.73
				3	0.86	48.2	50.94	1.08	48.6	50.32
				4	0.9	49.6	49.5	1.391	49.5	49.109
			40-60	1	0.86	49.2	49.94	0.95	49.7	49.35
				2	0.99	49.7	49.31	0.86	49.9	49.24
				3	0.92	49.75	49.33	0.86	49.2	49.94
				4	0.88	51.15	47.97	0.95	50.1	48.95
			60-80	1	0.98	50.65	48.37	0.762	51	48.238
				2	0.97	52.25	46.78	1.17	50.2	48.63
				3	1.11	50.45	48.44	1.05	49.5	49.45
				4	0.91	51.15	47.94	0.95	49.5	49.55
			80-100	1	1.03	46.95	52.02	0.79	48.7	50.51
				2	0.92	48.05	51.03	0.85	52	47.15
				3	0.89	46.95	52.16	0.97	50.6	48.43
				4	1.08	50.05	48.87	0.8	49.5	49.7

## Sheet: AWC
			Depth	Replication	FC	WP	AWC	FC	WP	AWC
					%			%
					Young raised bed			Old raised bed
			0-20	1	36.2	15.3	20.9	33.2	16.5	16.7
				2	35.6	14.9	20.7	31.6	14.7	16.9
				3	37.1	16.2	20.9	34.1	15.3	18.8
				4	36.6	15.1	21.5	33.5	13.9	19.6
			20-40	1	35.9	16.2	19.7	33.4	16.2	17.2
				2	36.6	14.8	21.8	31.5	15.1	16.4
				3	36.1	15.3	20.8	34.6	14.8	19.8
				4	36.7	15.6	21.1	33.9	13.7	20.2
			40-60	1	33.7	15.5	18.2	36.1	15.6	20.5
				2	34.2	14.6	19.6	32.4	16.7	15.7
				3	35.1	15.2	19.9	34.8	14.9	19.9
				4	33.8	14.9	18.9	35.3	13.7	21.6
			60-80	1	35.5	16.3	19.2	36	14.5	21.5
				2	32.9	14.3	18.6	32.7	16.2	16.5
				3	34.2	15.7	18.5	34.7	13.9	20.8
				4	33.9	16	17.9	34.6	15.5	19.1
			80-100	1	35.2	15.4	19.8	35.8	14.6	21.2
				2	33.5	16.3	17.2	35.1	16.2	18.9
				3	36.1	14.4	21.7	34.6	15.1	19.5
				4	34.7	15.1	19.6	32.8	14.8	18
